# Supplementary material
Source: PubMed Central journal article supplement (PMC4975959)
Supplement: NIHMS801452-supplement.pdf [file NIHMS801452-supplement.pdf]

**Supplemental Information for**

**A distributed recurrent network contributes to  
temporally precise vocalizations**

**Kosuke Hamaguchi, Masashi Tanaka, and Richard Mooney**

**Department of Neurobiology Duke University Medical Center**

**Contents:**

- 1) **Supplemental Experimental Procedures**
- 2) **Table S1**
- 3) **Figure S1-S7**

## 1 **Supplemental Experimental Procedures**

### 2 **Temperature manipulations using the Peltier device.**

3 A pair of silver cooling pads made from silver wire (A-M systems, Part #787550, O.D. 381  $\mu\text{m}$ ) was  
4 attached to one side of Peltier device (CustomThermoelectric, Part #01101-9G30-20CN) and the other  
5 side was attached to the custom-made 3D printed water-cooled heat sink made of silver (i.materialize Inc)  
6 by using thermo-conductive epoxy (CustomThermoelectric, Part #TE-ASTA-7G). The heat sink was  
7 attached to a pair of silicon tubes (A-M systems, Part #8061) to perfuse water through the water channel  
8 in the heat sink ( $\sim 450 \mu\text{l}/\text{min}$ ). The cooling pads were shaped to fit the lateral-medial distance of HVC  
9 (4.8 mm) or Uva (2.4 mm, targeting the medial edge of Uva to avoid damage). For Uva cooling,  
10 polyimide tubing (MicroLumen, Inc. #315-I.5, O.D. 873  $\mu\text{m}$ ) was also attached to the probes as an  
11 insulator to enhance the heat delivery. In a subset of experiments, an extended heat sink was placed on the  
12 lower leaflet of the skull to limit temperature changes in HVC caused by the cooling probe implanted in  
13 Uva. Birds were anesthetized with 1.5–2% isoflurane in oxygen and placed in a stereotaxic apparatus. The  
14 position of HVC was stereotaxically determined (0.0 mm anterior, 2.4 mm lateral from the bifurcation of  
15 Y-sinus). The position of Uva was determined with reference to the auditory thalamic nucleus Ovoidalis  
16 (Ov; 2.8 mm anterior, 1.0 mm lateral from Y-sinus, 4.5 – 5.0 mm deep), which was identified by its  
17 robust auditory responses. Uva was located at 1.5-1.7 mm posterior, 0.5 mm lateral of Ov. The outer layer  
18 of skull over the target region was largely removed and the inner layer of skull was removed to create an  
19 opening slightly larger than the size of the cooling pads. For HVC cooling, the cooling pads were placed  
20 over the dura. For Uva cooling, a column of brain tissue 4.0 mm deep was removed by aspiration and the  
21 probes were inserted near the medial-dorsal side of Uva (300 – 800  $\mu\text{m}$ , Figure S4). The surface of the  
22 brain was covered with Kwik-Kast (WPI, Inc), and the extended legs of the heat sink were cemented to  
23 the skull. The temperature of the target region was measured by a thermocouple (Omega, Part #5SRTC-  
24 TT-K-40-36) at the end of the experiment while the birds were anesthetized under Isoflurane (1.0% in  
25 Oxygen). For Uva cooling, retrograde tracer (Molecular Probes, Dextran Alexa Fluor 488, 10,000 MW)  
26 was injected in HVC either before or after the experiments to histologically identify Uva. The temperature  
27 change  $\Delta T$  is defined as the relative difference from the physiologically normal brain temperature ( $\sim 40$   
28 Celsius), which was maintained by running the Peltier device in the slightly warming direction to offset  
29 the cooling effect of placing the probe on the surface of the brain (Figure S1F, H). Song timing effects  
30 were measured as the relative changes from this “normal” temperature condition.

### 31 **Intracellular recordings in singing birds.**

32 The intracellular microdrive (original design by M. Fee (Long et al., 2010)) was built with a 3D printed  
33 plastic base and chassis (Agile Manufacturing, Inc, Ontario, Canada). A miniaturized headstage (by I.  
34 Yoon, equivalent to HS-2A headstage with gain x0.1, Axon Instruments) was mounted on the back of the  
35 base to amplify signals and receive command current from the intracellular recording amplifier  
36 (AxoClamp-2B, Axon Instruments) through a flexible tether cable (Omnetics, MN, USA). A linear  
37 actuator (Part # 0206A001B+02/1 47:1-Y2825, Micromo, FL, USA) controlled the position of the depth  
38 of the sharp microelectrode. The microdrive was surgically implanted over the right HVC using  
39 stereotaxic coordinates (2.4 mm lateral, 0 mm anterior from Y-sinus). HVC<sub>RA</sub> neurons were identified by  
40 antidromic stimulation with a bipolar stimulating electrode (a pair of 75  $\mu$ m diameter silver wires, ~500  
41  $\mu$ m apart, A-M systems, WA, USA) implanted in RA. HVC<sub>X</sub> neurons were identified by their  
42 spontaneous, DC-evoked, and singing-related activity. In total, we recorded from n = 24 identified  
43 HVC<sub>RA</sub> neurons and n = 82 HVC<sub>X</sub> neurons. Recordings were attempted for approximately 7-21 days per  
44 bird and recording microelectrodes were replaced maximally three times a day. Signals were recorded  
45 with in-house software written by KH in MATLAB (Mathworks).

46 **Synaptic event analysis in singing birds.** To detect depolarizing synaptic events during singing, an  
47 algorithm detecting large deviations of  $dV/dt$  was used (Ankri et al., 1994)(see example traces in Figure  
48 S7A, B). To align synaptic event data to the song, we identified the most typical syllable sequence using a  
49 semi-automatic algorithm run by a support vector machine as described below (see Syllable and gap  
50 duration analysis). The mean onset timings of identified syllables were defined as the standard timing  
51 markers. Detected synaptic events during a specific syllable sequence were aligned to each sound onset  
52 and linearly displaced relative to the standard timing markers. Then, synaptic event rates for a given cell  
53 were calculated as across trial-averages of synaptic events smoothed by a Gaussian filter (3ms SD). The  
54 time stretch was usually within 0 – 20 ms range. The signal correlation between cells was calculated as  
55 the correlation coefficient of the trial-averaged synaptic event rate within the typical syllable sequence.  
56 Surrogate data were generated by randomly shuffling the position of dPSP timings. This procedure was  
57 repeated to yield 10,000 pairs of shuffled data, and the p-value was calculated from the distribution of  
58 correlation coefficients generated from the shuffled data. The power spectrum of dPSPs of each cell was  
59 calculated by the multi-taper spectrogram of detrended, trial averaged dPSP rate (DPSS bandwidth  
60 parameter 4, number of tapers = 3).

61 **Brain slices.** After induction of inhalation anesthesia (isoflurene), the bird was decapitated, and the brain  
62 was removed rapidly and placed in oxygenated ice-cold artificial CSF (ACSF). The ACSF consisted of  
63 (in mM) 119 NaCl, 2.5 KCl, 1.3 MgCl<sub>2</sub>, 2.5 CaCl<sub>2</sub>, 1 NaH<sub>2</sub>PO<sub>4</sub>, 26.2 NaHCO<sub>3</sub>, and 11 glucose,  
64 equilibrated with 95%O<sub>2</sub>/5%CO<sub>2</sub>. Equiosmolar sucrose and CaCl<sub>2</sub> were respectively substituted for NaCl

65 and MgCl<sub>2</sub> during the tissue preparation stage. Sagittal brain slices that included HVC were cut at 300 μm  
66 thickness and transferred to a holding chamber (37 °C) for 30 mins and maintained in room temperature  
67 until use.

68 **Excitatory post-synaptic current (EPSC) and Calcium current recordings.** For EPSP onsets and I<sub>Ca</sub>  
69 rise time recordings, we made targeted patch-clamp recordings using MultiClamp 700B (Molecular  
70 devices) and pClamp software. Recordings were performed in 20 μM BMI with Cs-based intracellular  
71 solution (130 Cs-methanesulfonate, 10 HEPES, 0.2 EGTA, 4 ATP-Mg, 0.3 GTP-Na<sub>3</sub>, 10  
72 phosphocreatine-Na<sub>2</sub>, 8 TEA-Cl, 5 QX-314-Br, and 0.05 Alexa 594 hydrazide (pH 7.3, adjusted with  
73 CsOH; 295 mOsm), in mM). Electrodes were made with borosilicate glass pipettes (Patch, O.D. 1.5 mm,  
74 I.D. 0.86 mm, Sutter Instruments) pulled to 5-8M ohm when filled with Cs-based internal solution. For  
75 EPSC recordings, a bipolar stimulating electrode was placed in the fiber tract caudal to HVC to evoke  
76 EPSCs in HVC<sub>RA</sub> neurons. Latency to EPSC onsets was detected as the time of peak of smoothed dI/dt  
77 (box filter was applied with a window of 5 data points [0.25 ms]) from the stimulus onset. Calcium  
78 currents were activated by depolarizing HVC<sub>RA</sub> neurons to -30 mV for 500 ms from the resting membrane  
79 potential of -90 mV to fully activate calcium channels. Rise time was detected as the time of the peak of  
80 the calcium current from the current onset, determined by the peak of smoothed dI/dt (box filter was  
81 applied with a window of 5 data points [0.25 ms]). Calculation of Q<sub>10</sub> was based on 2 data points with  
82 min and max temperature (32-38 or 30-38 °C). The direction of temperature changes was  
83 counterbalanced to exclude the effects of rundown of calcium currents. Cells that exhibited substantial  
84 rundown during recording or resting current of < -100 pA with the holding potential of -70 mV were  
85 excluded from the analysis.

86 **HVC paired recordings.** The details of the paired recordings from HVC slices were fully described in  
87 (Mooney and Prather, 2005). Briefly, for the measurement of local synaptic latency, we made sharp  
88 intracellular recordings using AxoClamp2B amplifier (Molecular devices) and a custom data acquisition  
89 program (Labview, National Instruments). Electrodes were made with borosilicate glass pipettes (O.D.  
90 1.0 mm, I.D. 0.5mm, Sutter Instruments, Novato, CA) pulled to form 80-120M ohm resistance when  
91 filled with 2M potassium acetate. In paired recordings, one or two action potentials were elicited in turn  
92 from each neuron in the pair by passing brief (~10 ms) depolarizing current pulses (0.5 to 1 nA) through  
93 the recording electrode while monitoring the other cell for evoked PSPs. The bath temperature was  
94 changed (range from 23 °C to 37 °C, average ΔT = 5.9) to measure the temperature sensitivity of the  
95 synaptic latencies. A subset of data was also obtained from the targeted patch-clamp recording method  
96 described above, using Potassium-based internal solution (124 K-gluconate, 4 NaCl, 10 HEPES, 2 EGTA,  
97 2 MgCl<sub>2</sub>, 2 ATP-Mg, 0.3 GTP-Na<sub>3</sub>, 10 phosphocreatine-Na<sub>2</sub>, and 0.05 Alexa 594 hydrazide (pH 7.3,

98 adjusted with KOH; 295 mOsm), in mM). The action potential onset was defined as threshold crossing  
 99 event of the membrane potential (~20mV from baseline). The max dV/dt was used to detect synaptic  
 100 onset. Two data points were used to estimate  $Q_{10}$ .

101 **Table S1: Stability of  $Q_{10}$  values**

102 One potential concern is the extent to which the propagation of neural activity and song timing are well  
 103 characterized by  $Q_{10}$  values, which is a necessary precondition to compare  $Q_{10}$  values computed for brain  
 104 and behavior. Specifically, we note that using  $Q_{10}$  ( $L1/L2 = Q_{10}^{(T2-T1)/10}$ ) values to characterize  
 105 temperature effects implicitly assumes that the ratio of time constant changes only depends on the  
 106 temperature difference  $\Delta T = T2-T1$  and not on the on absolute temperature  $T2$  and  $T1$ . To confirm the  
 107 independence of  $Q_{10}$  values within the range of temperatures studied here, we calculated  $Q_{10}$  values from  
 108 maximal temperature differences ( $\Delta T < -6$  °C; from ~40 °C to less than ~34 °C) and intermediate  
 109 temperature differences ( $-6$  °C  $\leq \Delta T < -3$  °C; from ~40 °C to more than 34 °C). These calculations  
 110 confirmed that  $Q_{10}$  values measured for song timing did not differ between the intermediate and  
 111 maximum temperature ranges (Table S1). Similar calculations confirmed that the  $Q_{10}$  values of both  
 112 synaptic and action potential latencies measured for activity propagation times within HVC (data in  
 113 Figure 2) and across the recurrent network (data in Figure 3) did not differ between the intermediate and  
 114 maximum temperature ranges. These analyses confirmed that temperature effects on song timing and the  
 115 propagation of neural activity within the finch's brain are well characterized by  $Q_{10}$  values.

116

|                                                                     | Syllable and gap $Q_{10}$ (n=23) | Local latencies; synaptic $Q_{10}$ (Orthodromically evoked AP $Q_{10}$ ) | Network latency (synaptic + AP) $Q_{10}$ |
|---------------------------------------------------------------------|----------------------------------|--------------------------------------------------------------------------|------------------------------------------|
| $Q_{10}$ estimated from $\Delta T < -6$ °C (used in the main text). | $1.27 \pm 0.03$                  | $2.5 \pm 0.3$ ( $2.01 \pm 0.22$ )                                        | $1.25 \pm 0.15$                          |
| ↑<br>p-value<br>↓                                                   | P=0.23                           | P=0.3<br>(P=0.08)                                                        | P = 0.95                                 |
| $Q_{10}$ estimated from middle range $-6 \leq \Delta T < -3$        | $1.21 \pm 0.03$                  | $2.1 \pm 0.3$ ( $3.7 \pm 0.9$ )                                          | $1.26 \pm 0.07$                          |

117 **Table S1 (related to Figure 2) |  $Q_{10}$  values do not depend on temperature ranges. mean  $\pm$  SEM.**

118

119 **Simulation Methods**

120 To understand the fundamental differences in synaptic activity patterns generated by local and distributed  
121 synfire chains, we constructed computational models of two types of chain networks that relied on  
122 minimal assumptions. Following experimental observations (Hahnloser et al., 2002; Long et al., 2010),  
123 we set the following constraints to the models: i) ~50% of  $HVC_{RA}$  neurons generate action potentials  
124 during singing; ii) synaptic activity is non-zero outside of action potential timings; iii) the onset timing of  
125 synaptic inputs and the timings of action potentials are precise between motifs (or runs of simulations).  
126 We simulated network activity in each model and measured the timing of synaptic activity patterns in  
127 randomly selected pairs of neurons. These simulated recordings revealed that pairs of neurons in the local  
128 chain model exhibit no correlated synaptic activity whereas neurons in the distributed chain model display  
129 significant correlations in their synaptic activity.

130

131 **Local chain model**

132 We consider a local chain model consisting of 100 timing nodes embedded in a randomly connected  
133 network (Figure S6A). Under the assumption that a synchronized action potential activity takes ~5 ms to  
134 travel from one node to the next in the chain, this network will generate ~500 ms of sequential activity,  
135 which roughly corresponds to the duration of a zebra finch song motif. A set of excitatory neurons are  
136 randomly selected with a probability  $F$  to represent one timing node, and connected to the other randomly  
137 selected excitatory neurons representing the next timing. The connection from  $j$ -th neuron in  $l-1$  th node  
138 to  $i$ -th neuron in  $l$ -th node,  $J_{ij}^l$  is defined by the Hebbian learning rule;

139 
$$J_{ij}^l = \xi_i^l \xi_j^{l-1} J_{ij}^{l-1} = \xi_i^l \xi_j^{l-1},$$

140 where  $\xi_i^l = \{0,1\}$  is the silent/activated state of  $i$ -th neuron in the  $l$ -th node. The vector  
141  $\xi^l = [\xi_1^l, \xi_2^l, \dots, \xi_N^l]$  is called a memory pattern of  $l$ -th layer. The feedforward network  
142 embedded with sparse memory patterns have stable states in which synchronized action potentials  
143 propagate over multiple layers (Ishibashi et al., 2006). Because previous experiments reported that a small  
144 subset of  $HVC_{RA}$  neurons could fire multiple times during a single motif in zebra finches (Hahnloser et  
145 al., 2002; Long et al., 2010), the neuron once selected is not excluded from a later selection process, with  
146 the consequence that one neuron could be involved in more than one timing representation in the motif.  
147 Following experimental observations that nearly half of  $HVC_{RA}$  are active during song (Hahnloser et al.,  
148 2002), we set  $F = 1-(0.5)^{1/p} \sim 0.0069$  in the local chain model.

149 We define the critical synaptic strength  $J_c$  such that the membrane potential reaches the action potential  
150 threshold under the condition that the activity pattern of the presynaptic layer completely overlaps with  
151 the memory pattern (the inner product of the memory pattern and activity vector is 1;  $1/N \sum_i \xi_i^l x_i^l = 1$

152  $1/N \sum_i^N \xi_i^l x_i^l = 1$  where  $x^l = [x_1^l, x_2^l, \dots, x_N^l]$   $x^l = [x_1^l, x_2^l, \dots, x_N^l]$  is the population activity vector of  $l$ -th  
 153 layer). Synaptic connection strength  $J$  is set to 10 % larger than  $J_c$ .

154 Recurrent local interactions were modeled by adding a population of 1000 inhibitory HVC<sub>I</sub> neurons  
 155 which make the ratio of the number of inhibitory to excitatory neurons 1:4. The number of presynaptic  
 156 excitatory (HVC<sub>RA</sub>) neurons for one postsynaptic neuron is  $C_E C_E$  and the number of presynaptic  
 157 inhibitory neurons (HVC<sub>I</sub>) for one neuron is  $\beta C_E \beta C_E$  where  $\beta \beta$  is the ratio of the number of inhibitory to  
 158 excitatory neurons ( $\beta = \frac{1}{4} \beta = \frac{1}{4}$ ). Here, we set  $C_E = 40 C_E = 40$  which gives a random connection  
 159 probability of 0.01 (except for Figure S6I). The synaptic strength is set to  $J J_c$  for excitatory synapses and  
 160  $-g J_c - g J_{th}$  for inhibitory synapses. The parameter  $g g$  represents the ratio of inhibitory to excitatory  
 161 synapse strength. When the firing rates of excitatory and inhibitory neurons are the same,  $g = \frac{1}{\beta} = 4$   
 162  $g = \frac{1}{\beta} = 4$  gives the exact balance of inputs from random-recurrent connections. We set the network state  
 163  $g = 5$  (i.e., slightly inhibitory dominant) to prevent unstable oscillatory states (Brunel, 2000). The other  
 164 HVC projection neuron type (i.e., the HVC<sub>X</sub> cell) is not necessary for singing (Scharff et al., 2000),  
 165 therefore we did not explicitly model HVC<sub>X</sub> cell activity here.

166

### 167 **Distributed chain model**

168 We consider a distributed chain model that consists of four groups of neurons representing four song  
 169 production nuclei: HVC, RA, the brainstem vocal respiratory group (VRG), and Uva, a major afferent to  
 170 HVC that links the VRG to HVC and that is critical to singing (Figure S6E). Each group consists of 1600  
 171 excitatory neurons and 400 inhibitory neurons. For each group, a set of excitatory neurons is randomly  
 172 selected with a probability  $F$  to represent one timing node. The neurons in a node are assigned as the  
 173 activated neurons and make long-range connections to the activated neurons in the next timing node in the  
 174 next group following the Hebbian learning rule. Similar to the local chain model, selected neurons are not  
 175 excluded from the later selection process. Neurons in the fourth group (i.e., Uva) make long-range  
 176 connections to neurons in the first group (HVC) to form the circular chain structure. This process is  
 177 repeated  $P$  times to generate a longer chain structure embedded in the distributed network. We set  $P = 25$   
 178 so that activity propagates in total through 100 nodes in the distributed chain model (25 cycles in total).  
 179 This 100-layer distributed network generates ~500 ms of sequential activity, which roughly corresponds  
 180 to the duration of a zebra finch song motif with the assumption that a synchronized action potential volley  
 181 takes ~5 ms to travel from one node to the next. Therefore, the connection from  $j$ -th neuron in  $l-1$  th node  
 182 to  $i$ -th neuron in  $l$ -th node,  $J_{ij}^l$ , is defined as follows;

183  $J_{ij}^1 = \sum_k^P \xi_i^{[1,k]} \xi_j^{[1-1,k]} J_{ij}^1 = \sum_k^P \xi_i^{[1,k]} \xi_j^{[1-1,k]},$

184 where  $\xi_i^{[1,k]} = \{0,1\} \xi_i^{[1,k]} = \{0,1\}$  is the  $k$ -th silent/active state of  $i$ -th neuron in  $l$ -th node. The vector

185  $\xi^{[1,k]} = [\xi_1^{[1,k]}, \xi_2^{[1,k]}, \dots, \xi_N^{[1,k]}] \xi^{[1,k]} = [\xi_1^{[1,k]}, \xi_2^{[1,k]}, \dots, \xi_N^{[1,k]}]$  is called  $k$ -th memory pattern of  $l$ -th layer.

186 Following experimental observations that nearly half of HVC<sub>RA</sub> are active at least once during song

187 (Hahnloser et al., 2002), we set  $F = 1 - (0.5)^{\frac{1}{F}} \sim 0.0273F = 1 - (0.5)^{\frac{1}{F}} \sim 0.0273$  which will result in

188 action potential activity in ~50% of the HVC<sub>RA</sub> neurons over a ~500 ms period. This indicates that less

189 than 3 % of neurons are active at one time in one group, but within a single run of activity, approximately

190 50 % of neurons will be activated. Synaptic connection strength is set to 10 % larger than  $J_{c|c}$ . Random

191 local connections are generated exactly in the same manner as we described in the local chain model.

192 Note that the focus of this modeling effort is to understand whether differences in the connectivity of

193 HVC neurons play an important role in defining the correlation level of synaptic input patterns, regardless

194 of the implementation of the dynamics of the RA and VRG groups. The only assumption we make here is

195 that the RA and VRG groups can rapidly convey changes in the HVC group's firing rate back to HVC

196 during singing. Therefore, the implementation of local network structure in each group is statistically

197 similar in the distributed chain model.

198

### 199 **Neuron model**

200 To understand the relationship between the synaptic input distribution and network activity patterns

201 without involving the details of the implementation of action potential generation, we used the leaky

202 integrate-and-fire neuron model to implement the membrane dynamics of the HVC<sub>RA</sub> and HVC<sub>I</sub> neurons

203 using the same model parameters. The membrane potential dynamics of a neuron are described as:

204  $\tau_m \frac{dv_i}{dt} = -(v_i - V_L) + I_i,$

205  $\tau_s \frac{dI_i}{dt} = -I_i + \tau_s \sum_j J_{ij} \sum_k \delta(t - t_j^k - D),$

206 where  $v_i$  is the membrane potential of the  $i$ -th neuron,  $V_L$  is the leak potential, and  $I_i$  is the input

207 current of  $i$ -th neuron.  $\tau_m$ ,  $\tau_s$  are the membrane and current time constant, respectively.  $\delta(t)$  is

208 the delta-function, and  $t_j^k$  is the  $k$ -th action potential timings of  $j$ -th neuron,  $D$  is the delay between the

209 timing of presynaptic action potential to the postsynaptic synaptic onset. When the membrane potential

210 exceeds the threshold voltage  $V_{th}$  ( $v_i > V_{th}$ ), a neuron emits an action potential and the

211 membrane potential is set to the reset potential  $V_{reset}$  and remains insensitive to the input current

212 during the refractory time period  $t_{ref}$ . The parameters of the model and networks are summarized at



213 the end of this section. We did not incorporate bursting properties in individual HVC<sub>RA</sub> neurons to reduce  
214 the complexity of the model. This should not affect synaptic activity patterns because the membrane  
215 potential time constant (~20ms) is slow relative to the firing rate within the burst (>200Hz); this slow  
216 time constant will filter out higher frequency components of the synaptic activity driven by high  
217 frequency action potential bursts.

218

### 219 **Behaviors of local and distributed chain models**

220 The architecture of the network plays an important role in shaping synaptic correlations. In local chain  
221 models, the action potential activity traveling through the local chain model is temporally uniform. The  
222 resultant synaptic activity patterns transmitted by these random local connections are also temporally  
223 random and uncorrelated between neurons. In contrast, in the distributed chain model, synaptic inputs are  
224 transiently generated in many neurons once in every four propagation steps, while the rest of the time  
225 synaptic input would remain relatively silent. The temporal organization of active and silent phases of  
226 synaptic activity, which contrasts with the uniform synaptic activity of the local chain model, could  
227 generate detectable correlations between neurons within HVC. We confirmed these predictions using  
228 simulations of the local and distributed chain models.

229

### 230 **Simulations of neural activity in local and distributed chain models**

231 First, the simulation of a local chain model (Figure 6F, Figure S6A) displayed sequential action potential  
232 activity that propagated through 100 groups in a stable manner. To quantify the similarity of activated  
233 patterns to the embedded patterns, we calculated the overlap parameters. The overlap parameters are  
234 defined as the inner product of the population activity vector and each memorized pattern. An overlap  
235 parameter is 0 when the activated pattern is orthogonal to the memory pattern and 1 when all the neurons  
236 in the memory pattern are activated. The overlap parameters showed sequential activation patterns and  
237 approached a value of 1 (Figure S6B,C), suggesting that the embedded patterns are activated in the  
238 learned order. Then, we randomly sampled the membrane potential activity of 20 excitatory neurons  
239 (Figure 6G). Examples of membrane potential traces from 2 runs of simulations are shown (Figure S6D).  
240 The baseline synaptic activity was non-zero and within a cell was stereotyped between runs, as we  
241 observed in the intracellular recordings experiments made in the HVC of singing finches. However, no  
242 significant correlation was detected in synaptic onset timings between pairs of neurons, as revealed by the  
243 correlation coefficient analysis (Figure 6I, Top, gray circles). Still, it is possible that weak synaptic  
244 correlations could be detected by measuring the population average. Therefore, we calculated the  
245 population averaged synaptic activity from half of the neurons in the group but this average activity  
246 diverged from that calculated using the other half of the neurons in the population (Figure 6I, Bottom,

247 gray circles). These results suggest that synaptic input timings in different neurons are not correlated in a  
248 local chain model.

249

250 Second, we simulated the distributed chain model (Figure 6A, Figure S6E), in which sequential action  
251 potential activity propagates through the four groups repeatedly (i.e., 25 cycles). To clearly visualize the  
252 sequential action potential activity patterns, we calculated overlaps parameters of the first (i.e., the HVC)  
253 group. The overlap parameters showed stable transitions of action potential activity from the first to the  
254 last memorized patterns (Figure S6F,G), indicating that divergent connections embedded in the system  
255 did not prevent stable transitions. However, when one of the overlap parameters is activated, some of  
256 other overlap parameters are also active which is evident from the small baseline fluctuations of other  
257 overlap parameters (Figure S6F,G). Next, we randomly sampled 20 excitatory neurons activity from the  
258 HVC group (Figure 6C). Although the action potential activity in different cells formed a sequential  
259 pattern, underlying synaptic activity appeared to be both more frequent and correlated between cells.  
260 Examples of membrane potential traces from 2 runs of simulations are shown in Figure S6H. Neurons in  
261 the distributed chain model have frequent incidents of correlated synaptic onsets (highlighted by dashed  
262 lines, Figure S6H). In fact, the correlations in the synaptic onset timings between pairs of neurons were  
263 significant (Figure S6I, Top, red circles). Furthermore, the population averaged synaptic activity from  
264 half of neurons in the group had clear similarities to that calculated from the other half (Figure S6I,  
265 Bottom, red circles).

266

267 Both our local and distributed models also captured the observation made with extracellular and  
268 intracellular recordings in singing birds that a small fraction of  $HVC_{RA}$  neurons can be active more than  
269 once in the motif (see Figure 2b, neuron #2, of Hahnloser et al., 2002; Supplementary Figure 2, Bird#15  
270 of Long et al., 2010). The percentage of neurons active more than once in our simulations is ~13% (see  
271 following section for an accounting of this percentage); the actual percentage of  $HVC_{RA}$  neurons that are  
272 of this less sparsely active type is unknown. To summarize, our simulation results indicate that neurons  
273 within a single group in the distributed chain model exhibit significantly correlated synaptic inputs,  
274 whereas neurons in the conventional local chain model do not exhibit correlations in their synaptic  
275 activity patterns (Fig. 6I). Furthermore, this prediction is highly robust in the face of variations in network  
276 structure within the range of parameters where sequential activity propagates in a stable manner (Figure  
277 S6I). For example, we can change the balance of random local interaction and feedforward interaction.  
278 The parameter  $C_E C_E$  defines the number of presynaptic excitatory neurons. The number of Inhibitory  
279 neurons is defined as  $\beta C_E \beta C_E$ , therefore excitatory-inhibitory balance is maintained. One reasonable  
280 expectation of a local chain model is that neurons should display higher synaptic correlation levels if the

281 number of local connections ( $C_E$ ) is changed. However, we found that changing  $C_E$  did not change  
282 the correlation level of local chain models (Figure S6I) until the network attained a new stable state where  
283 neurons maintain random action potential activity through local random connections (Figure S6J,K). The  
284 transition from sequential to random activity states can induce correlations in the system (Figure S6I), but  
285 such a network no longer has HVC-like stable sparse sequential action potential activity.

286

### 287 **Synaptic Correlation Analysis in Simulations**

288 Synaptic correlation is calculated as the correlation coefficient of trial-averaged synaptic event rates  
289 between pairs of neurons. The trial-averaged synaptic event rates were obtained by averaging 5 runs of  
290 simulations. Ten randomly selected pairs of excitatory neurons from the local chain model or from the  
291 HVC group in the distributed chain were used for this analysis. We repeated this procedure in 5 different  
292 realizations of network architecture, which were generated from different seeds of pseudo-random  
293 variables to calculate the synaptic correlations. The similarity of the population averaged synaptic event  
294 rate was calculated as the correlation coefficient of population averaged synaptic activity obtained from  
295 two groups neurons, each containing 10 neurons. Data were generated in the same way as described  
296 above, using 5 runs of simulations repeated with 5 different network realizations.

297

### 298 **Overlap Analysis**

299 Overlaps between the action potential activity and  $k$ -th memorized patterns are defined as:

300 
$$m^k(t) = \frac{1}{N} \sum_i \xi_i^k x_i(t) \quad m^k(t) = \frac{1}{N} \sum_i \xi_i^k x_i(t)$$

301 where  $x_i(t) = 1$  if neuron  $i$  generates an action potential at time  $t$ , otherwise set to zero. We  
302 smoothed  $m^k(t)$  with 1ms SD Gaussian window to account for the jitter in action potential timings  
303 in each trial. The lower and upper bound of the overlap parameter is zero (no overlap with the memory  
304 pattern  $k$ ) and 1 (complete overlap with the memory pattern  $k$ ).

305

### 306 **Linearity Index**

307 Whether memorized patterns are sequentially activated in the correct order was quantified by calculating  
308 a linearity index, which was defined as:

309 
$$Lin = \frac{\text{\# of correct transitions}}{\text{\# of total transitions}}$$

310 For example, if the memory pattern is embedded in the order of [1,2,3,4,5], then an activation pattern  
311 [1,2,4,5] has  $Lin = 2/3$ . This index is 1 when only the correct transitions are observed and 0 when no

312 correct transitions are observed. Activation of a pattern is detected as the threshold exceeding events of  
313 overlap parameters. Here, the threshold is set to 0.3.

314

### 315 **Expected ratio of active cells**

316 We consider the problem of selecting cells with a probability  $F$  for multiple times ( $N$ ) with replacement.

317 This means a cell can be selected more than once. The probability of a cell  $k$ -times selected among  $N$ -  
318 times selection process is described as the binomial distribution,

$$319 P(N,k) = {}_N C_k F^k (1-F)^{(N-k)},$$

320 where  ${}_N C_k = N! / ((N-k)! k!)$ .

321 From the experimental constraint that nearly half of cells do not fire action potential during singing, we  
322 can calculate  $F = 1 - (0.5)^{1/N}$ .

323 For the local chain model, we have  $N=100$  layers of propagation steps, therefore  $F = 0.0069$ .

324 Next, the probability that a cell fires once is

$$325 P(N,1) = N * F * (1-F)^{N-1} = 0.3478.$$

326 The remaining is the probability that a cell fires more than once, which is 0.1522. For a circular chain  
327 model,  $N = 25$ , then  $F = 0.0273$  and the probability of a cell fire more than once is 0.1486. For a finite  
328 size simulation, there is a small fluctuation from this value (in our simulation, both models are  $\sim 0.13$ ).

329

330 **Summary of the network and neuron model parameters.**

331

| Network parameters                                            | In equation | Unit    | Local chain | Distribute d chain |
|---------------------------------------------------------------|-------------|---------|-------------|--------------------|
| Connection strength (excitatory) <sup>(1)</sup>               | $J$         | $I_c^*$ | 1.1         | 1.1                |
| Number of local excitatory presynaptic neurons <sup>(2)</sup> | $C_E$       |         | 40          | 40                 |
| Ratio of number of Inh/Exc neurons                            | $\beta$     |         | 1/4         | 1/4                |
| Number of local inhibitory presynaptic neurons                | $\beta C_E$ |         | 10          | 10                 |
| Ratio of the strength of Inh/Exc synapse                      | $g$         |         | 5           | 5                  |
| Connection strength (inhibitory)                              | $-gJ$       | $I_c$   | -4.4        | -4.4               |
| Number of regions                                             |             |         | 1           | 4                  |
| Number of excitatory neurons in one region                    |             |         | 4000        | 1000               |
| Number of memorized patterns in HVC                           | $P$         |         | 100         | 25                 |
| Memory pattern firing rate                                    | $F$         |         | 0.0069      | 0.0273             |

332 1)  $I_c$  is defined as the critical strength of synaptic efficacy that drives the membrane potential reach to  
 333 the action potential threshold when a complete memory pattern is activated in the presynaptic  
 334 neurons.

335 2)  $C_E C_E$  is varied in Figure S6 to test the robustness of the model.

336

| Single neuron parameters                 |             | Unit | Value |
|------------------------------------------|-------------|------|-------|
| Membrane time constant                   | $\tau_m$    | ms   | 20    |
| Synaptic exponential decay time constant | $\tau_s$    | ms   | 2     |
| Leak potential                           | $V_L$       | mV   | -60   |
| Threshold potential                      | $V_{th}$    | mV   | -50   |
| Reset potential                          | $V_{reset}$ | mV   | -60   |
| Refractoriness                           | $t_{ref}$   | ms   | 2     |
| Synaptic delay                           | $D$         | ms   | 4     |

337

338

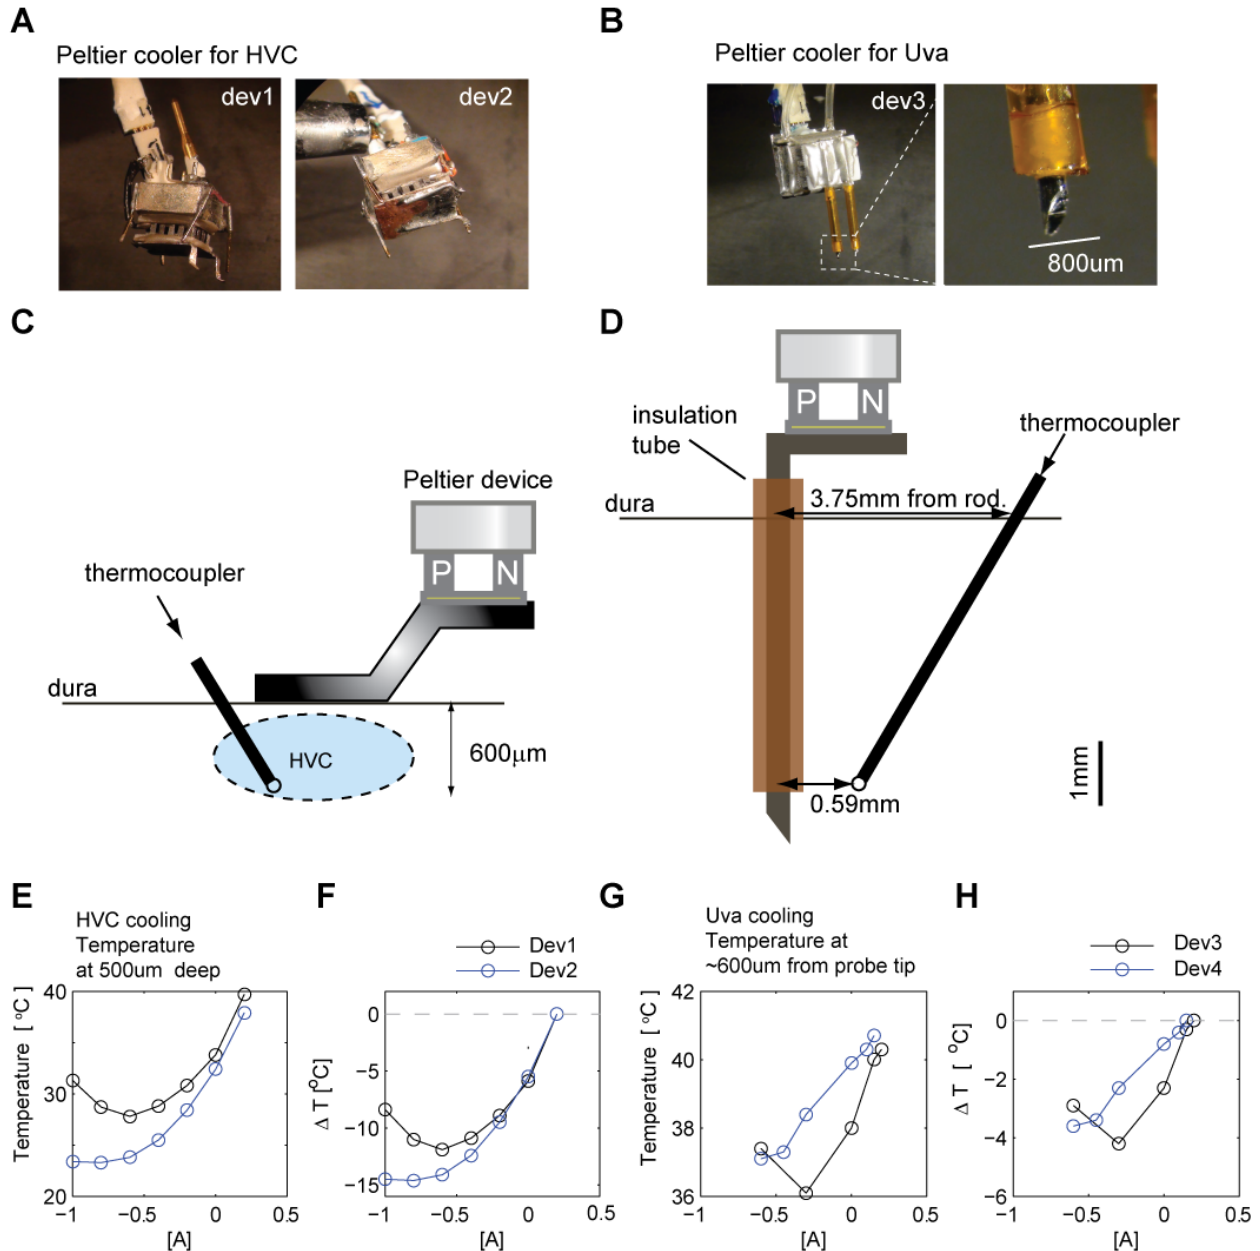

341  
 342 **Figure S1 (related to Figure 1)| Custom made Peltier cooling devices for surface and deep cooling.**  
 343 **A,B,** Peltier cooling devices for HVC surface cooling (A) and Uva cooling (B). **C,D,** Schematic diagram  
 344 showing the methods to measure temperature in HVC (C) and near Uva (D). **E,F,** Typical brain  
 345 temperature for a given current (E). Even without applying current, we observed that placing a metal plate  
 346 coupled to a heat sink significantly cools the brain by ~ 2 °C, as also reported in (Long and Fee, 2008).  
 347 Therefore, we compensated for this cooling offset by slightly warming the brain. The change of brain  
 348 temperature was measured relative to this compensated (warmed) temperature (F). Temperature was  
 349 measured at least 30 sec after the current setting was changed. **G,H,** Similar measurements made ~5 mm  
 350 deep in the brain close to Uva. Compared to the HVC surface cooling probe, the Uva cooling probe has  
 351 less cooling capacity at the tip because of the larger surface area along the probe's length.

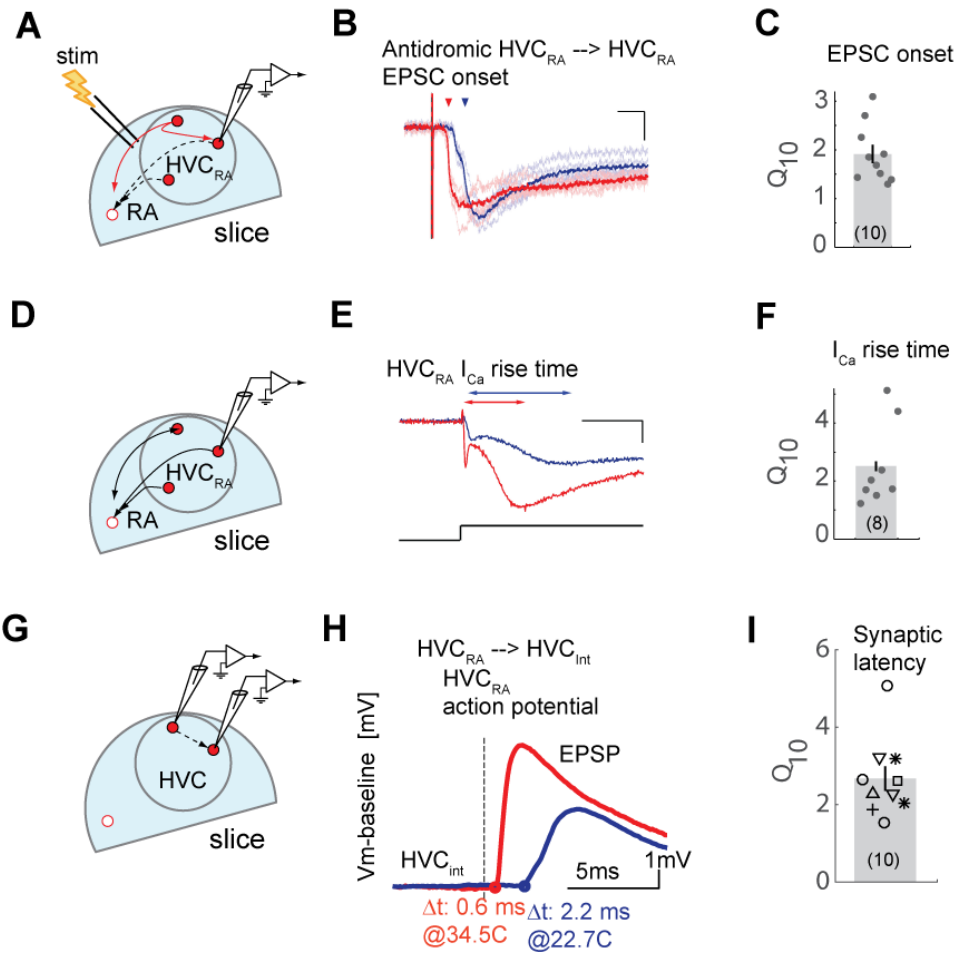

|     |                    | Post              |                  |                    |
|-----|--------------------|-------------------|------------------|--------------------|
|     |                    | HVC <sub>RA</sub> | HVC <sub>X</sub> | HVC <sub>Int</sub> |
| Pre | HVC <sub>RA</sub>  | +                 | ○                | *                  |
|     | HVC <sub>X</sub>   | -                 | △                | ▽                  |
|     | HVC <sub>Int</sub> | -                 | □                | ◇                  |

352  
353  
354  
355  
356  
357  
358  
359  
360  
361  
362  
363  
364  
365

**Figure S2 (related to Figure 2) | A**, Schematic diagram of the experimental setup to measure local HVC<sub>RA</sub> - HVC<sub>RA</sub> interactions in brain slices. **B**, An example of an EPSC evoked in an HVC<sub>RA</sub> cell by antidromic stimulation of HVC<sub>RA</sub> axons. (red: 38 °C, blue: 32 °C). Scale bar: 5 ms, 50 pA. **C**, Bath temperature significantly affects synaptic transmission between HVC<sub>RA</sub> neurons (n = 10 cells, Synaptic onset latencies  $Q_{10} = 1.91 \pm 0.19$ ). **D**, Schematic diagram of the experimental setup to measure voltage dependent Ca currents HVC<sub>RA</sub> cells in brain slices. **E**, An example of the Ca current evoked in an HVC<sub>RA</sub> cell (red: 38°C, blue: 32 °C). Command voltage is from -90 mV to -30 mV; recordings were performed with cesium and QX-314 in the pipette to block potassium and sodium currents. Scale bar: 5 ms, 200 pA. **F**, Bath temperature significantly affects the rise time of  $I_{Ca}$  in HVC<sub>RA</sub> cells (n = 9 cells,  $Q_{10} = 2.51 \pm 0.51$ ). **G**, Schematic diagram of paired sharp/patch recordings in HVC slices to measure the latencies of synaptic transmission within HVC. **H**, An example of EPSP recorded in HVC<sub>Int</sub> evoked by an action potential in an HVC<sub>RA</sub> cell. **I**, Bath temperature significantly affects synaptic transmission between different HVC PN types and interneurons (n = 10 pairs,  $Q_{10} = 2.67 \pm 0.31$ ). Mean  $\pm$  SE.

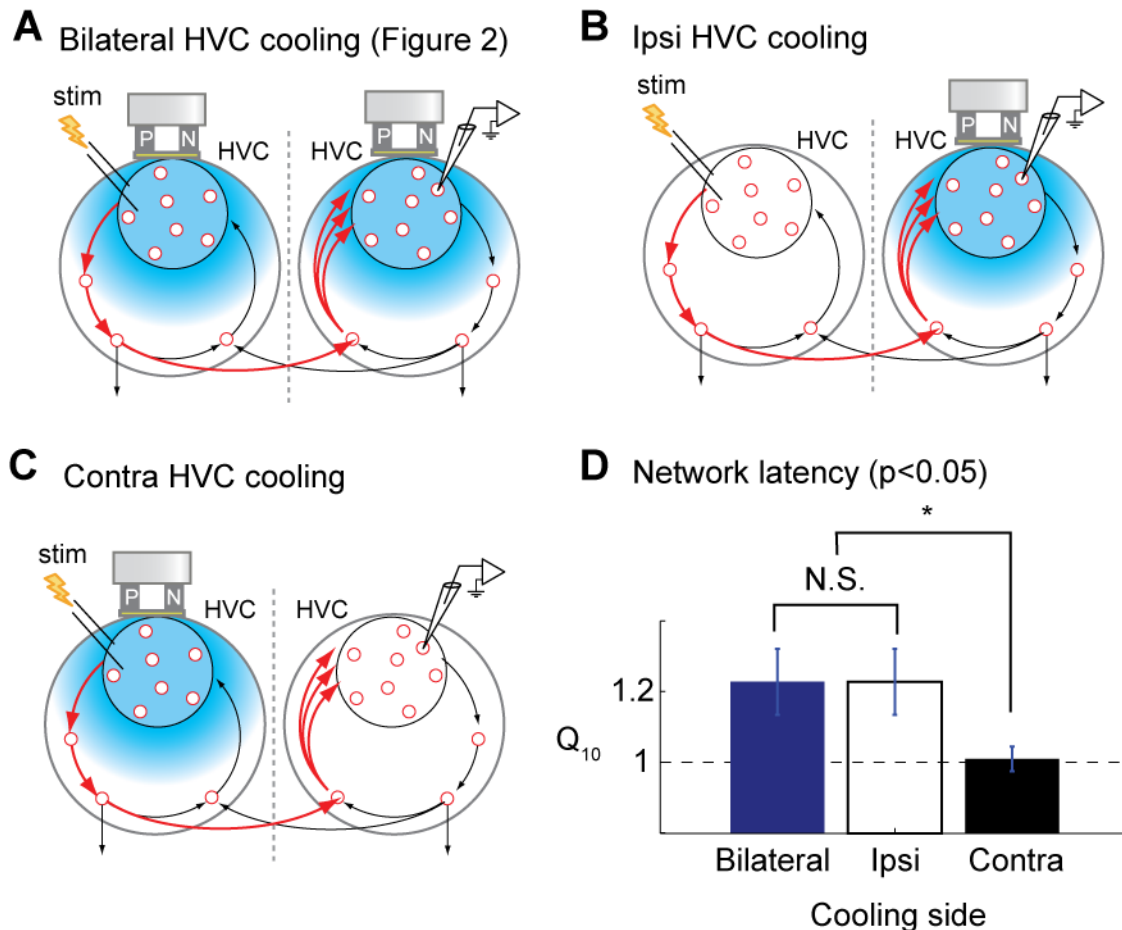

366  
 367  
 368  
 369  
 370  
 371  
 372  
 373  
 374  
 375  
 376  
 377  
 378  
 379

**Figure S3 (related to Figure 3) | Dilation of activity propagation is largely attributable to temperature effects on synaptic transmission, as changes in axonal conduction times were negligible.** A-C, Schematic diagrams of the experimental setup to compare the effect of (A) bilateral, (B) ipsilateral, (C) contralateral HVC temperature manipulations. D, Temperature manipulation of HVC on the stimulating side (contra) had no significant effect on the synaptic onset and action potential timings ( $n = 7$ ,  $Q_{10} = 1.01 \pm 0.03$ ; no significant difference from  $Q_{10} = 1$ ;  $P=0.82$ ). The lack of an effect of contralateral cooling on activity propagation suggests that focal cooling of HVC exerts negligible effects on axonal conduction velocity near the cooled site. In contrast, temperature manipulation on the side of the intracellular recording exerted effects on activity propagation through the recurrent network similar to the effects of bilateral HVC cooling (Ipsi;  $n = 4$ ,  $Q_{10} = 1.23 \pm 0.09$ ; no significant difference from bilateral cooling effect,  $n = 18$ ,  $Q_{10} = 1.21 \pm 0.04$ ,  $P=0.85$ ). This result suggests that the delayed synaptic response observed in bilateral HVC cooling is largely attributable to effects on synaptic transmission local to the recorded cell.



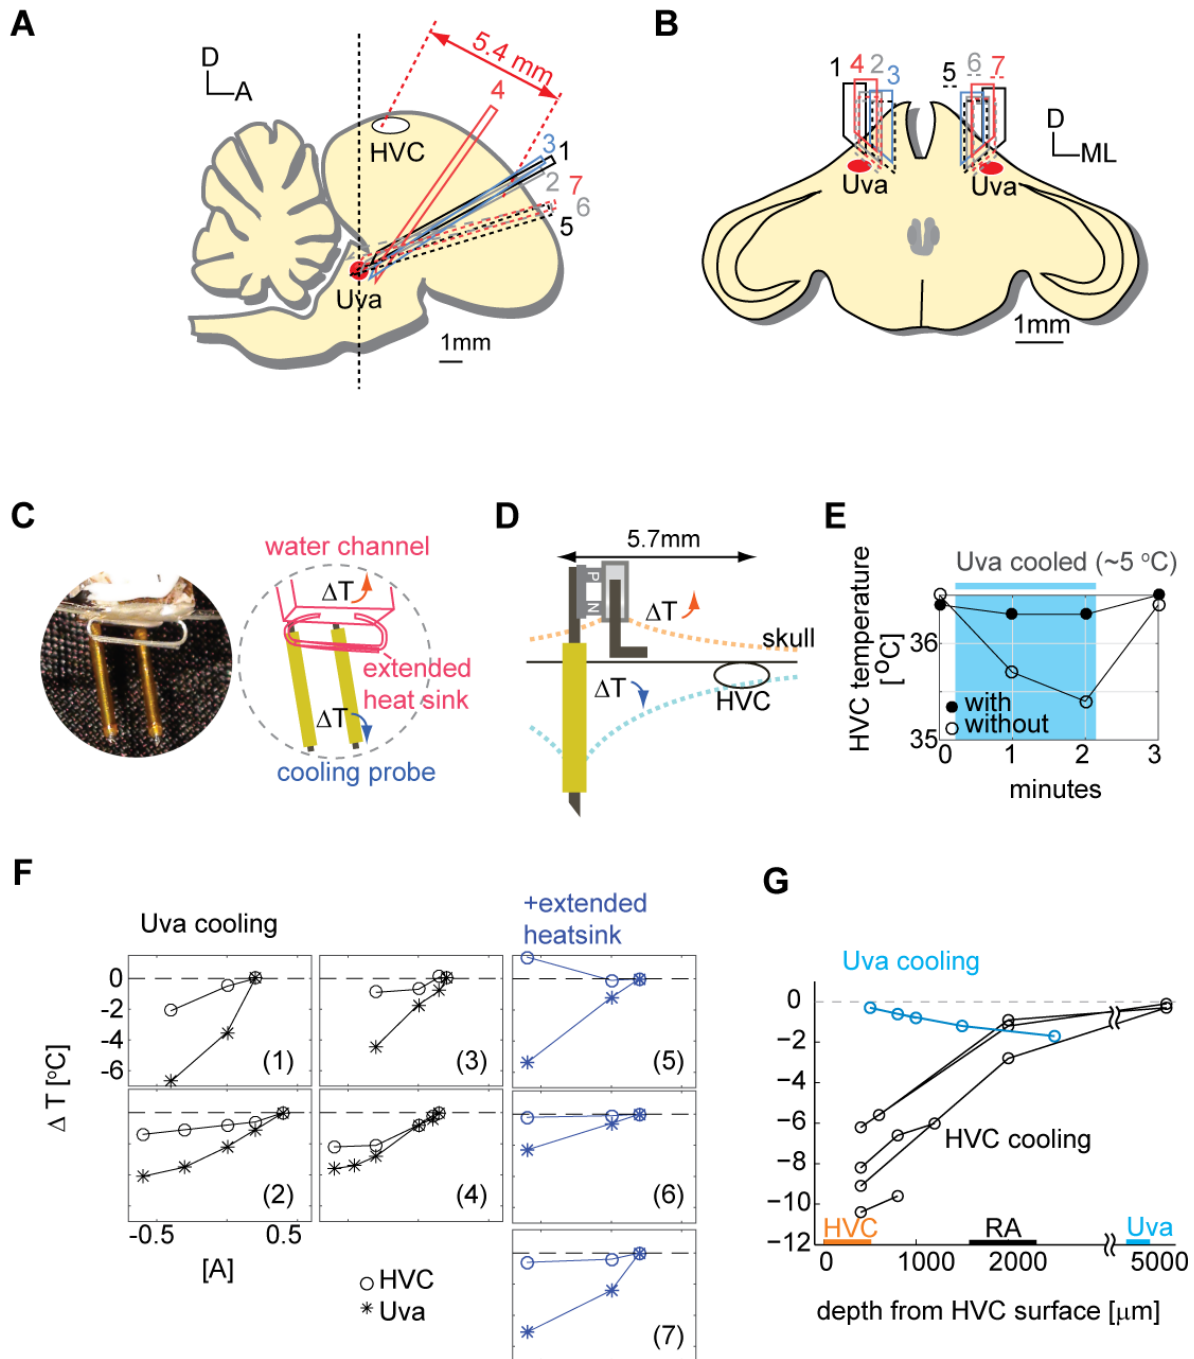

380  
 381  
 382  
 383  
 384  
 385  
 386  
 387  
 388  
 389

**Figure S4 (related to Figure 4) | Locations of cooling probes used in deep brain temperature manipulations.** **A,B**, Reconstructed positions of the cooling probes in four birds used for deep brain cooling experiments (Fig. 3). Cooling probes were targeted to the dorsomedial side of Uva. (A) Sagittal section. (B) Coronal section. **C**, Modified Peltier cooling device with extended heat sink. **D**, Schematic showing the positions of the cooling probe and the extended heat sink. **E**, an example of HVC temperature during Uva cooling with and without extended heat sink. **F**, Relationships between the temperature near Uva and HVC. **G**, Decay of temperature changes measured at various depths when the surface of HVC is cooled (black circles) or when thalamic regions near Uva are cooled (blue circles).

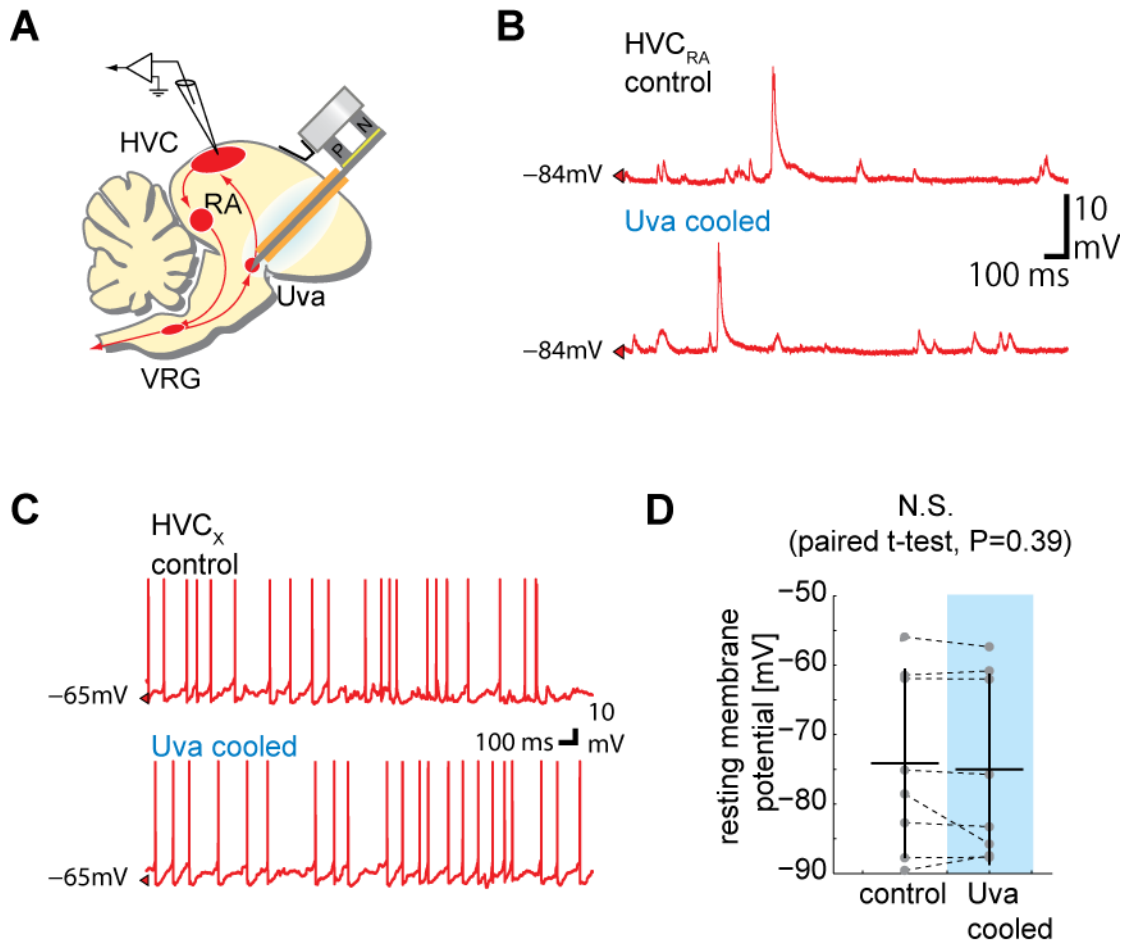

390  
391  
392  
393  
394  
395  
396  
397

**Figure S5 (related to Figure 5) | Uva cooling does not affect resting membrane potentials of HVC neurons.** **A**, Schematic diagrams of the experiments. After measuring the song dilation effect of Uva cooling, a subset of birds of which HVC temperature were well clamped were used for sharp intracellular recordings from HVC neurons under isoflurane anesthesia. **B**, **C**, example traces of membrane potential dynamics of HVC<sub>RA</sub> (**B**) and HVC<sub>X</sub> (**C**). **D**, Uva cooling did not change the resting potential of HVC PN (n = 3 HVC<sub>RA</sub>, n = 3 HVC<sub>X</sub>, n = 2 HVC<sub>int.</sub>,  $P < 0.39$ ).

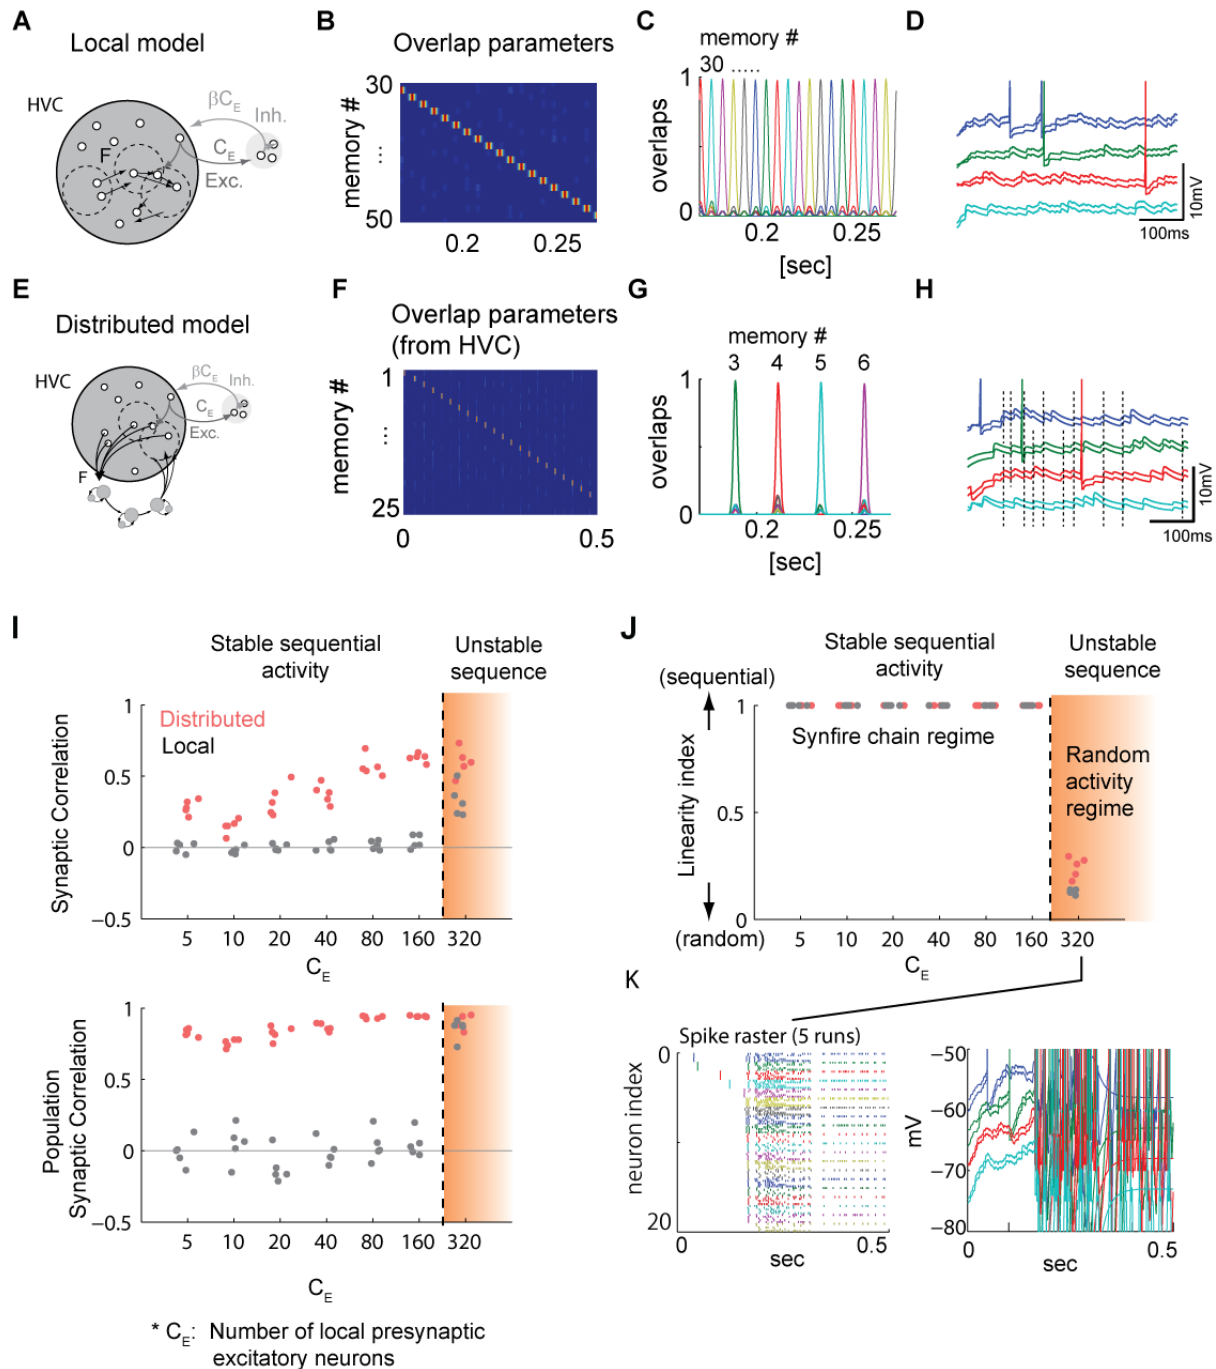

398

399

400

401

402

403

404

405

406

407

**Figure S6 (related to Figure 6) | (Simulation Result) Overlap parameters and membrane potential dynamics in two models.** **A**, Schematic of local chain models. **B**, Overlap parameters represent the similarity between the action potential activity and each memorized pattern. The sequential activation pattern of overlap parameters indicates that the embedded patterns are activated in the correct order. **C**, When one of the overlap parameter is activated, the activity of some of other overlap parameters is slightly elevated (small fluctuations near the baseline) due to the divergent connections. This indicates that a small number of cells are activated outside of the correct timing; however, these numbers are not large enough to disturb the correct flow of the activation pattern. **D**, Examples of membrane potential traces from two runs of simulations in the local model. **E**, Schematic of distributed chain models. **F,G**,

408 Overlap parameter plots of HVC neurons in distributed chain models. **H**, Examples of membrane  
409 potential traces from two runs of simulations in the distributed model. **I**, Synaptic correlation from pairs  
410 (Top) and populations (Bottom) of neurons with various numbers of local recurrent excitatory  
411 connections,  $C_E$ . Each dot is calculated from 5 runs of simulations in the same network with different  
412 initial conditions in membrane potential values. Within the chain network regime ( $C_E < 320$ ), the  
413 distributed but not the local chain models generate correlated synaptic activity. **J**, As the number of local  
414 interactions  $C_E$  increases, sequential activity is no longer maintained (orange shaded region), and the  
415 network dynamics approaches the random activity regime in which random action potential activity is  
416 maintained by local random connections. **K**, An example of network activity (left) and membrane  
417 potential dynamics (right) near the boundary of synfire chain and random activity regimes ( $C_E = 320$ ,  
418 Local chain model).  
419

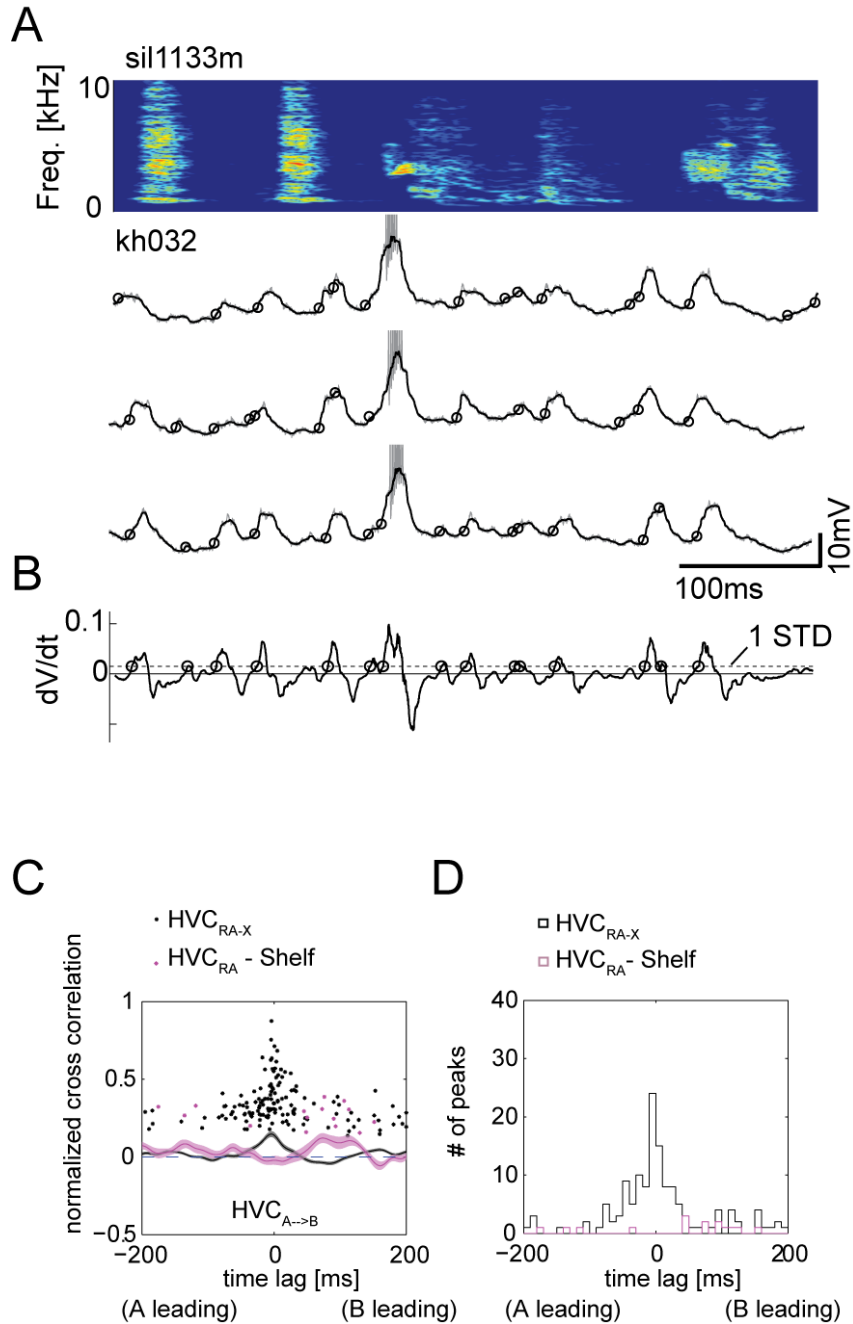

420

421 **Figure S7 (Related to Figure 8) | dPSP detection algorithm can detect most large depolarizing**

422 **synaptic events. The synaptic onset timings of  $HVC_{RA}$  and  $HVC_X$  neurons are not significantly**

423 **biased from time lag zero. A, Examples of  $HVC_{RA}$  cells membrane potential dynamics during singing**

424 **(grey lines) and median filtered traces (5ms window, black lines). Circles: detected dPSP onsets. B, An**

425 **example of dV/dt trace measured from the bottom trace in (A). The detection threshold is 1xSTD of dV/dt**

426 **trace. C, Normalized cross correlation of synaptic onset timing between  $HVC_{RA} - HVC_X$  (black) and**

427  **$HVC_{RA} - Shelf$  (red) neuron pairs. The peaks of cross correlation values of all the pairs are plotted.**

428 **Population averaged synaptic correlation is plotted with SEM (hatched region). D, The distribution of the**

429 **peak timings for  $HVC_{RA} - HVC_X$  pairs and  $HVC_{RA} - Shelf$  pairs.**

430

431 **References for Supporting Information**

- 432 Brunel, N. (2000). Dynamics of Sparsely Connected Networks of Excitatory and Inhibitory Spiking  
433 Neurons. *J Comp Neurosci* 8, 183-208.
- 434 Hahnloser, R.H., Kozhevnikov, A.A., and Fee, M.S. (2002). An ultra-sparse code underlies the generation  
435 of neural sequences in a songbird. *Nature* 419, 65-70.
- 436 Ishibashi, K., Hamaguchi, K., and Okada, M. (2006). Theory of Interaction of Memory Patterns in  
437 Layered Associative Networks. *Journal of the Physical Society of Japan (JPSJ)* 75, 114803.
- 438 Long, M.A., and Fee, M.S. (2008). Using temperature to analyse temporal dynamics in the songbird  
439 motor pathway. *Nature* 456, 189-194.
- 440 Long, M.A., Jin, D.Z., and Fee, M.S. (2010). Support for a synaptic chain model of neuronal sequence  
441 generation. *Nature* 468, 394-399.
- 442 Mooney, R., and Prather, J.F. (2005). The HVC Microcircuit: The Synaptic Basis for Interactions  
443 between Song Motor and Vocal Plasticity Pathways. *J Neurosci* 25, 1952-1964.
- 444 Scharff, C., Kirn, J.R., Grossman, M., Macklis, J.D., and Nottebohm, F. (2000). Targeted neuronal death  
445 affects neuronal replacement and vocal behavior in adult songbirds. *Neuron* 25, 481-492.
